# Supplementary material
Source: PubMed Central journal article supplement (PMC3811413)

# Supplemental material

## **Novel Small Molecule HIV-1 Replication Inhibitors that Stabilize Capsid Complexes**

Louie Lamorte<sup>1##</sup>, Steve Titolo<sup>1</sup>, Christopher T. Lemke<sup>2</sup>, Nathalie Goudreau<sup>2</sup>, Jean-François Mercier<sup>1</sup>, Elizabeth Wardrop<sup>1</sup>, Vaibhav B. Shah<sup>4</sup>, Uta K. von Schwedler<sup>3\*</sup>, Charles Langelier<sup>3&</sup>, Soma S. R. Banik<sup>1δ</sup>, Christopher Aiken<sup>4</sup>, Wesley I. Sundquist<sup>3</sup>, Stephen W. Mason<sup>1@#</sup>

Boehringer Ingelheim (Canada) Ltd., Research & Development, <sup>1</sup>Department of Biological Sciences and <sup>2</sup>Department of Chemistry, Laval, Quebec, Canada; <sup>3</sup>University of Utah, Department of Biochemistry, Salt Lake City, Utah USA; <sup>4</sup>Vanderbilt University School of Medicine, Department of Microbiology and Immunology, Nashville, TN USA

Co-corresponding authors:

## [RESGeneral.LAV@boehringer-ingelheim.com](mailto:RESGeneral.LAV@boehringer-ingelheim.com)

# [Stephen.Mason@bms.com](mailto:Stephen.Mason@bms.com)

### **Present addresses:**

& University of California San Francisco, Department of Medicine, CA, USA

δ Integral Molecular, 3711 Market St, Suite 900, Philadelphia, PA, USA

@ Bristol-Myers Squibb, Wallingford, CT, USA

\* Deceased

**FIG S1 Stabilization of CA-NC tube-like structures by BI-2.** CA assembly assay was performed in solution using 9  $\mu\text{M}$  CA-NC and 1  $\mu\text{M}$  oligonucleotide ((TG)<sub>50</sub>) at different NaCl concentrations (300, 400 and 500 mM) in 100  $\mu\text{l}$  of assay buffer containing 50mM TrisCl pH 8.0 and 5 mM  $\beta$ -mercaptoethanol, in the presence of 5, 20 or 200  $\mu\text{M}$  BI-2 or DMSO, for 16 h at 4°C. CA-NC tubes were pelleted by centrifuging samples for 30 min at 14,000 rpm in a micro-centrifuge. The pellets (P) were solubilized in 5x SDS loading buffer (250 mM TrisCl pH 6.8, 10 % SDS, 0.5% Bromophenol blue, 50 % glycerol and 500 mM  $\beta$ -mercaptoethanol), and the supernatant (S) was adjusted to 1X SDS-PAGE loading buffer (final concentration (50 mM TrisCl pH 6.8, 2 % SDS, 0.1% Bromophenol blue, 10 % glycerol and 100 mM  $\beta$ -mercaptoethanol). Both samples were denatured for 5 min at 95°C and resolved by polyacrylamide gel electrophoresis (12% acrylamide). Gels were fixed and stained with Coomassie Blue. Data shown are representative of 3 independent experiments.

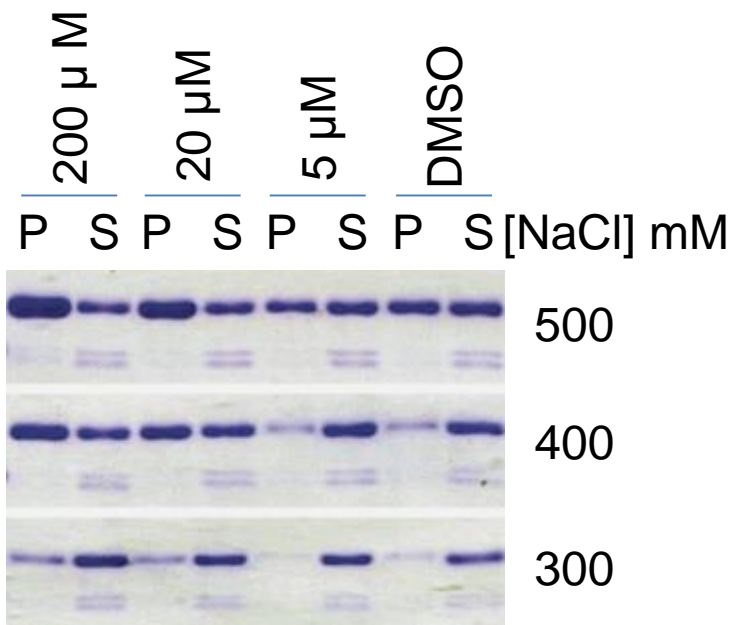

**Table S1: Data processing and final model refinement statistics of co-crystal structure of CA<sub>NTD</sub> in complex with BI-1.**

---

| <b>Data Collection</b>                |                                                       |
|---------------------------------------|-------------------------------------------------------|
| <b>Space group</b>                    | <i>P</i> 2 <sub>1</sub> 2 <sub>1</sub> 2 <sub>1</sub> |
| <b><i>a, b, c</i> (Å)</b>             | 40.78, 42.94, 83.28                                   |
| <b><i>α, β, γ</i> (°)</b>             | 90.0, 90.0, 90.0                                      |
| <b>Resolution range (Å)</b>           | 40-1.74 (1.8-1.74)                                    |
| <b>Completeness (%)</b>               | 96.6 (93.2)                                           |
| <b>Redundancy</b>                     | 8.2 (7.1)                                             |
| <b><i>&lt; I / σI &gt;</i></b>        | 21.0                                                  |
| <b><i>R</i><sub>merge</sub></b>       | 0.047 (.445)                                          |
| <b>Refinement</b>                     |                                                       |
| <b>Resolution range (Å)</b>           | 29.74-1.73 (1.79-1.73)                                |
| <b>No. reflections, working</b>       | 13491 (1526)                                          |
| <b>No. reflections, test</b>          | 1205 (127)                                            |
| <b>Final <i>R</i><sub>cryst</sub></b> | 0.197 (0.413)                                         |
| <b>Final <i>R</i><sub>free</sub></b>  | 0.233 (0.422)                                         |
| <b>R.m.s. deviations</b>              |                                                       |
| <b>Bond lengths (Å)</b>               | 0.003                                                 |
| <b>Bond angles (°)</b>                | 0.79                                                  |
| <b>Ramachandran plot</b>              |                                                       |
| <b>Favoured regions (%)</b>           | 98.6                                                  |
| <b>Additionally allowed (%)</b>       | 1.4                                                   |

---

**Table S2: Antiviral potency of BI-1 and BI- 2 against NNRTI drug-resistant VSV-G pseudotyped HIV-1 virus.**

| Virus      | wild type                      | RT<br>K103N/<br>Y181C                             | RT<br>V106A | RT<br>Y188L |
|------------|--------------------------------|---------------------------------------------------|-------------|-------------|
| Inhibitor  | EC <sub>50</sub><br>( $\mu$ M) | Average EC <sub>50</sub> fold change <sup>a</sup> |             |             |
| BI-1       | 8.2                            | 0.9                                               | 1           | 1           |
| BI-2       | 1.8                            | 1                                                 | 1           | 1           |
| nevirapine | 0.072                          | >30                                               | >30         | >30         |

<sup>a</sup>The average fold EC<sub>50</sub> change represents the ratio of the EC<sub>50</sub> against the mutant virus versus the EC<sub>50</sub> against the wild type virus. Values represent the average of at least 3 independent experiments.

**FIG S2** Bound BI-1 was superposed into the equivalent binding site in hexameric CA (3MGE PDB structure). The surface of hexameric CA, viewed perpendicular to the 6 fold axis, is colored by monomer, with the residues of the N-terminal domain (1 to 146) in lighter shades. Bound BI-1 is shown in white sticks.

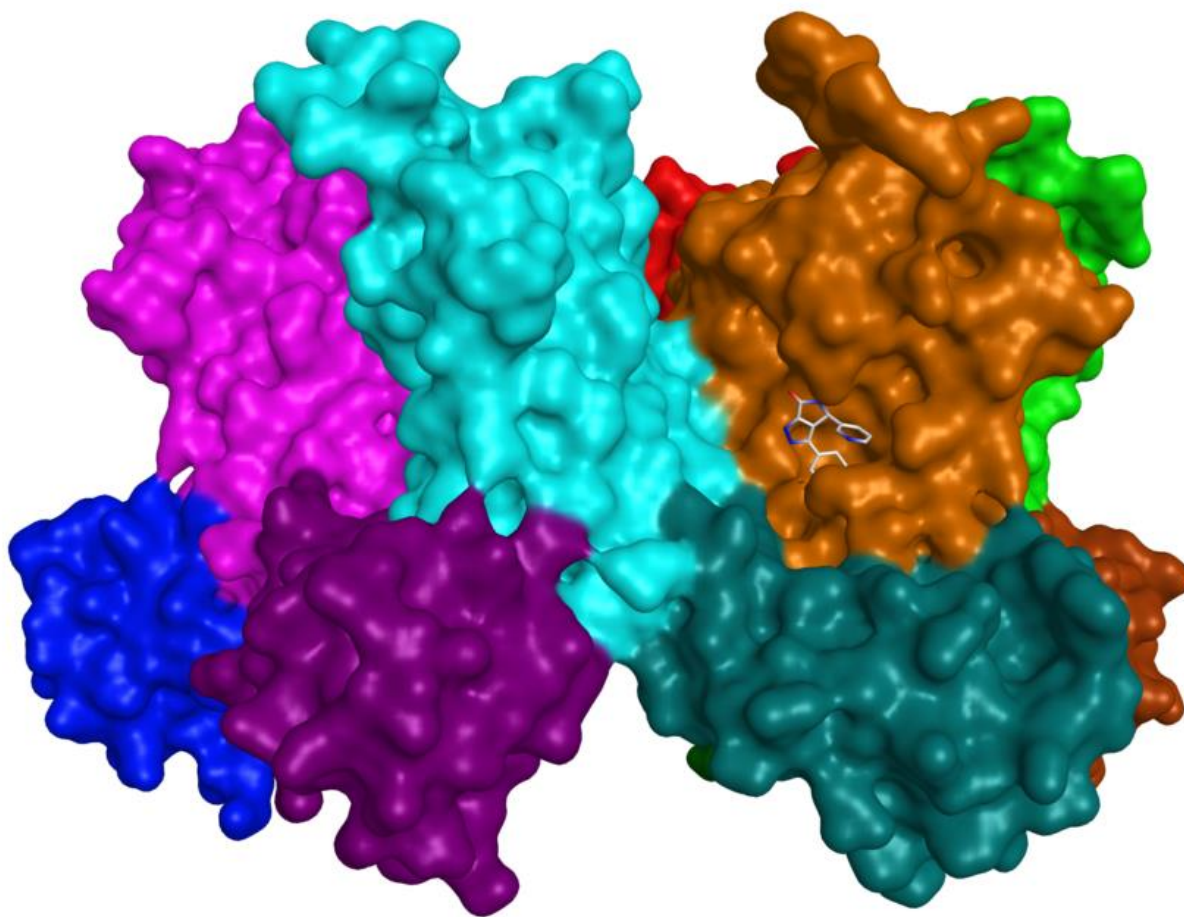

Supplement: AAC.00985-13_zac009132137so1.pdf [file AAC.00985-13_zac009132137so1.pdf]
